# Supplementary material
Source: Springer Nature journal article supplement (https://www.springermedizin.de/resource/supplementary/12906_2012_1205_MOESM4_ESM.pdf/9520126)
Supplement: MOESM4 [file 9520126]

Table 4 Reasons for prescribing Kampo medicine (n=200)

| Motivations                                                         | All (n=200) |      | Palliative care teams(n=149) |      | PCUs(n=46) |      | p-value | specialists(n=75) |      | non-specialists(n=125) |      | p-value |
|---------------------------------------------------------------------|-------------|------|------------------------------|------|------------|------|---------|-------------------|------|------------------------|------|---------|
|                                                                     | frequency   | %    | frequency                    | %    | frequency  | %    |         | frequency         | %    | frequency              | %    |         |
| Expansion of alternatives in drug therapy                           | 144         | 72.0 | 108                          | 72.5 | 34         | 73.9 | 0.933   | 55                | 73.3 | 89                     | 71.2 | 1.000   |
| Ineffectiveness by other treatments                                 | 129         | 64.5 | 98                           | 65.8 | 27         | 58.7 | 0.810   | 51                | 68.0 | 78                     | 62.4 | 0.631   |
| Unavailability of other appropriate treatments                      | 127         | 63.5 | 97                           | 65.1 | 29         | 63.0 | 0.593   | 52                | 69.3 | 75                     | 60.0 | 0.260   |
| Adverse events can be alleviated                                    | 109         | 54.5 | 91                           | 61.1 | 17         | 37.0 | 0.010   | 42                | 56.0 | 67                     | 53.6 | 1.000   |
| QOL can be improved and holistic treatment can be conducted         | 95          | 47.5 | 74                           | 49.7 | 19         | 41.3 | 0.610   | 34                | 45.3 | 61                     | 48.8 | 0.545   |
| Scientific evidences in Kampo medicine have started being reported  | 84          | 42.0 | 62                           | 41.6 | 19         | 41.3 | 0.177   | 26                | 34.7 | 58                     | 46.4 | 0.097   |
| Because of increasing in elderly patients who have several diseases | 67          | 33.5 | 54                           | 36.2 | 12         | 26.1 | 0.572   | 24                | 32.0 | 43                     | 34.4 | 0.639   |
| Kampo medicine have started being described on the guidelines       | 56          | 28.0 | 42                           | 28.2 | 13         | 28.3 | 1.000   | 16                | 21.3 | 40                     | 32.0 | 0.102   |
| Patient's demand                                                    | 46          | 23.0 | 34                           | 22.8 | 11         | 23.9 | 0.932   | 28                | 37.3 | 18                     | 14.4 | 0.000   |

\*Multiple answers allowed
